# Supplementary material for: Electrically conductive and mechanically strong biomimetic chitosan/reduced graphene oxide composite films
Source: Royal Society of Chemistry journal article supplement (doi:10.1039/c0jm01852j), 2010-01-01
Supplement: c0jm01852j.pdf [file c0jm01852j.pdf]

## Supplementary Information for

### Electrically conductive and mechanically strong biomimetic chitosan/reduced graphene oxide composite films

Xiluan Wang, Hua Bai, Zhiyi Yao, Anran Liu, Gaoquan Shi\*

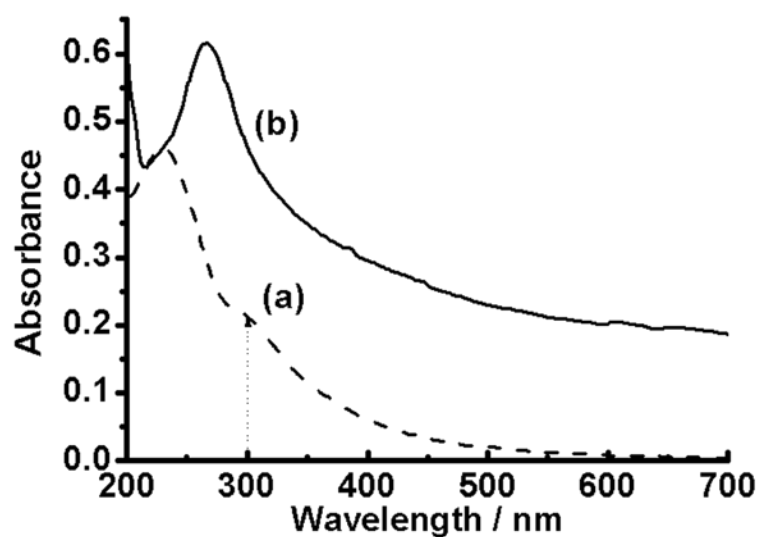

Fig. S1 UV-visible spectra of graphene oxide dispersion stabilized with  $\text{EO}_{133}\text{PO}_{50}\text{EO}_{133}$  before (a) and after (b) reduction.

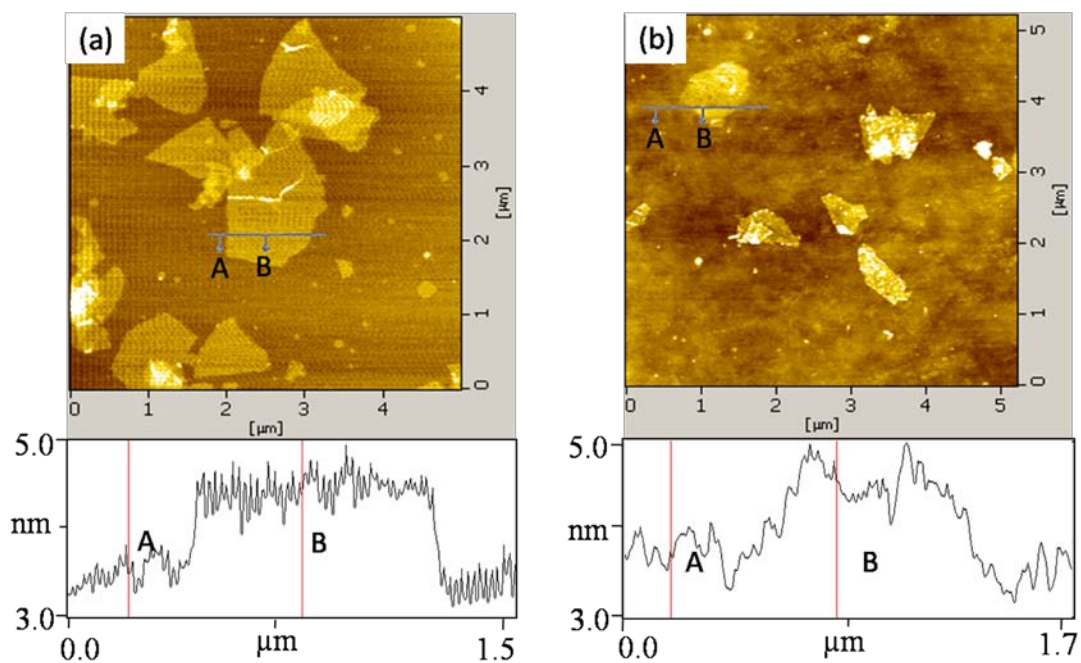

**Fig. S2** Tapping-mode AFM images of (a) graphene oxide and (b) RGO sheets with height profiles. The thickness of a graphene oxide or RGO sheet is about 1 nm, suggesting a monolayer structure.<sup>1</sup>

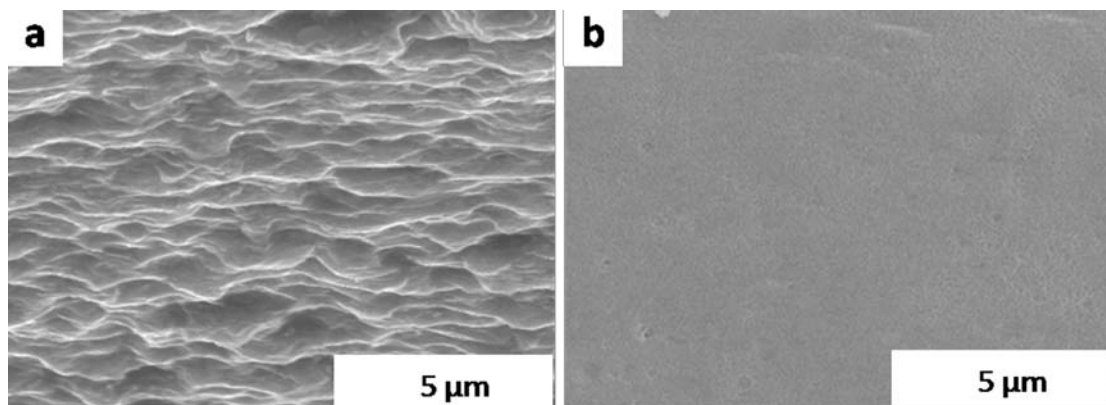

**Fig. S3** Cross-section SEM images of (a) CTS/6 wt% RGO and (b) chitosan films.

## Reference

1. S. Z. Zu and B. H. Han, *J. Phys. Chem. C*, 2009, **113**, 13651.
